# Supplementary material
Source: MDPI journal article supplement (https://www.mdpi.com/2073-445X/12/1/236)
Supplement: s1 [file s1]

**Table S1.** Data sources and preprocessing procedures.

| Data name                   | Years            | Spatial resolution | Sources and data preprocessing                                                                                                                                                                                                                                |
|-----------------------------|------------------|--------------------|---------------------------------------------------------------------------------------------------------------------------------------------------------------------------------------------------------------------------------------------------------------|
| Land use data-set           | 2018             | 1km                | Obtained from the Resource and Environment Data Cloud Platform ( <a href="http://www.resdc.cn/">http://www.resdc.cn/</a> )                                                                                                                                    |
|                             | 2000, 2005, 2010 | 30m                | Geospatial Data Cloud platform ( <a href="http://www.gscloud.cn/">http://www.gscloud.cn/</a> )                                                                                                                                                                |
| Meteorological data         | 2010~2018        | 1km                | provided by China Meteorological Data Service Center ( <a href="http://data.cma.cn/en/">http://data.cma.cn/en/</a> ) and interpolated to grid data with ArcGIS                                                                                                |
| Elevation, slop, aspect     | 2018             | 1km                | The soil type map of Guanzhong Region is extracted from 1:1,000,000 soil data set of China.<br>DEM is downloaded from Geospatial Data Cloud ( <a href="http://www.gscloud.cn/">http://www.gscloud.cn/</a> ).Slop and aspect are derived from DEM with ArcGIS. |
| Socio-economic spatial data | 2018             | 1km                | Collected from the Statistics Yearbook. And interpolated to grid data with ArcGIS                                                                                                                                                                             |

**Table S2.** The parameter of 12 land use scenarios of Guanzhong Region in 2050.

| Scenario                    | Parameter  | Development Goals                                                                                                                                                                                                         |
|-----------------------------|------------|---------------------------------------------------------------------------------------------------------------------------------------------------------------------------------------------------------------------------|
| Business As Usual (BAU)     | Scenario 1 | RCP 2.6<br>The lowest scenario. The population growth rate, GDP and technical development level is still in a low level, and advocate bioenergy utilization and restore vegetation.                                       |
|                             | Scenario 2 | RCP 4.5<br>Medium emission scenario. Considering the economic development factors, by adjusting the energy structure and supporting the use of clean energy technologies, as to reduce greenhouse gas emissions.          |
|                             | Scenario 3 | RCP 6.0<br>A stabilization scenario. The total radiative forcing is stabilized after 2100, by employing a range of technologies and strategies for reducing greenhouse gas emissions.                                     |
|                             | Scenario 4 | RCP 8.5<br>A comparatively high greenhouse gas emissions. High population, with lowest rates of technological innovate and energy intensity improvements, leading in the long term to hige energy demand and GHG.         |
| Ecological Protection (ELP) | Scenario 5 | RCP2.6 & ELP scenario<br>Base on the RCP2.6 climate scenario, this scenario adopt the China's Grain for Green Program. In the high slope areas, consider planting forested land and grassland instead of cultivated land. |

|                                     |             |                          |                                                                                                                             |
|-------------------------------------|-------------|--------------------------|-----------------------------------------------------------------------------------------------------------------------------|
| Rapid Urban<br>Development<br>(RUD) | Scenario 6  | RCP4.5 & ELP<br>scenario | Base on the RCP4.5 climate scenario, the same as above.                                                                     |
|                                     | Scenario 7  | RCP6.0 & ELP<br>scenario | Base on the RCP6.0 climate scenario, the same as above.                                                                     |
|                                     | Scenario 8  | RCP8.5 & ELP<br>scenario | Base on the RCP8.5 climate scenario, the same as above.                                                                     |
|                                     | Scenario 9  | RCP2.6 & RUD<br>scenario | Base on the RCP2.6 climate scenario, the city central areas continuously expend, lead to increasing construction land area. |
|                                     | Scenario 10 | RCP4.5 & RUD<br>scenario | Base on the RCP4.5 climate scenario, the same as above.                                                                     |
|                                     | Scenario 11 | RCP6.0 & RUD<br>scenario | Base on the RCP6.0 climate scenario, the same as above.                                                                     |
|                                     | Scenario 12 | RCP8.5 & RUD<br>scenario | Base on the RCP8.5 climate scenario, the same as above.                                                                     |
|                                     |             |                          |                                                                                                                             |
|                                     |             |                          |                                                                                                                             |
|                                     |             |                          |                                                                                                                             |
|                                     |             |                          |                                                                                                                             |
|                                     |             |                          |                                                                                                                             |

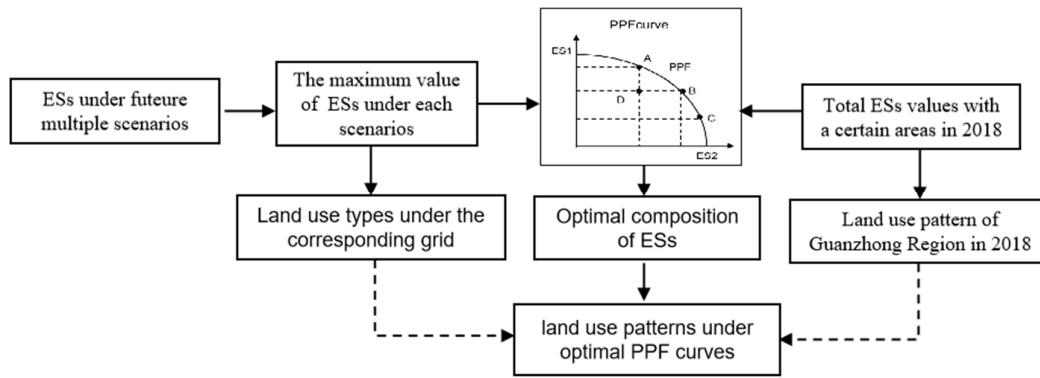

**Figure S1.** The flowchart of ecosystem service optimization.

**Table S3.** Land uses areas of each scenario in 2050 in Guanzhong Region (km<sup>2</sup>).

|           | Cultivated<br>land | Forested<br>land | Grassland | Water  | Construction<br>land | Bared land |
|-----------|--------------------|------------------|-----------|--------|----------------------|------------|
| Scenario1 | 21796.49           | 17603.23         | 12835.81  | 473.61 | 1156.53              | 4.38       |
| Scenario2 | 20715.23           | 13597.44         | 17841.97  | 473.32 | 1187.50              | 49.56      |
| Scenario3 | 18925.26           | 15659.83         | 15736.02  | 378.08 | 3095.66              | 68.86      |
| Scenario4 | 16501.45           | 17062.35         | 18142.17  | 471.80 | 1628.99              | 57.49      |
| Scenario5 | 19909.98           | 18479.53         | 13807.09  | 478.45 | 1165.94              | 4.38       |
| Scenario6 | 21262.98           | 17715.03         | 12678.89  | 426.13 | 1738.99              | 6.67       |
| Scenario7 | 17361.87           | 16316.43         | 16598.15  | 384.23 | 3111.46              | 68.86      |

|            |          |          |          |        |         |       |
|------------|----------|----------|----------|--------|---------|-------|
| Scenario8  | 15041.06 | 17650.19 | 18985.94 | 471.60 | 1634.56 | 57.49 |
| Scenario9  | 21262.98 | 17715.03 | 12678.89 | 426.13 | 1738.99 | 6.67  |
| Scenario10 | 20400.61 | 13632.30 | 17541.06 | 430.48 | 1762.03 | 61.26 |
| Scenario11 | 17451.60 | 15776.89 | 15480.39 | 315.20 | 4764.52 | 37.27 |
| Scenario12 | 16374.42 | 16991.38 | 17720.56 | 440.60 | 2229.92 | 59.89 |

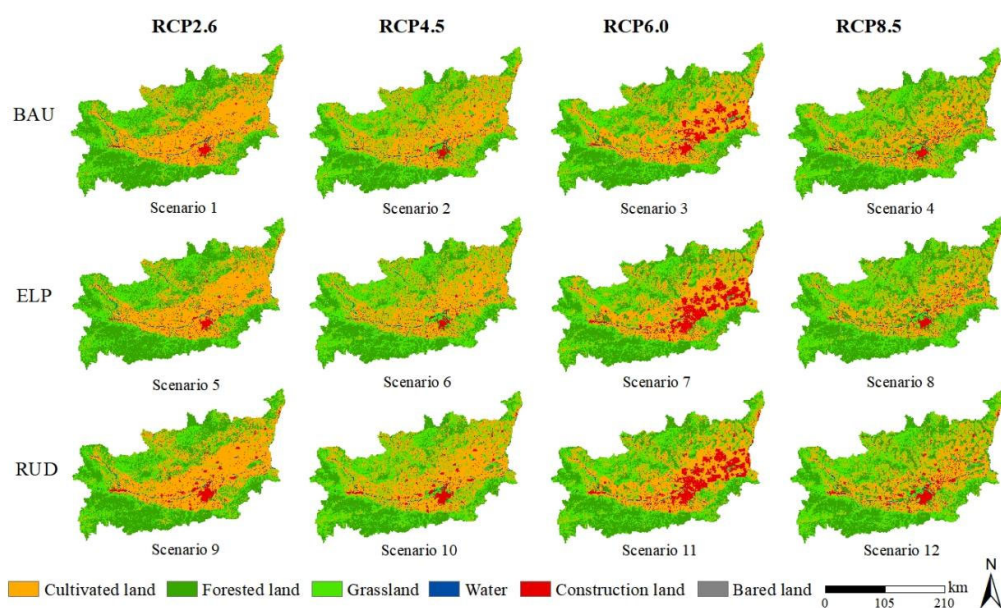

**Figure S2.** Land use spatial pattern changes under the multiple scenarios in 2050 of Guanzhong Region.

**Table S4.** The average value of four ecosystem services under multiple scenarios in 2050.

|            | CS (t/km2<br>) | HQ   | SC (t/km2<br>) | FS (t/km2<br>) |
|------------|----------------|------|----------------|----------------|
| Scenario 1 | 1 457.95       | 0.59 | 7 053.43       | 334.65         |
| Scenario2  | 1 439.85       | 0.59 | 7 059.60       | 327.25         |
| Scenario3  | 1 343.28       | 0.58 | 7 043.61       | 297.33         |
| Scenario4  | 1 448.20       | 0.61 | 7 018.11       | 271.74         |
| Scenario5  | 1 460.19       | 0.61 | 7 029.84       | 311.42         |
| Scenario6  | 1 450.66       | 0.60 | 7 032.54       | 307.09         |
| Scenario7  | 1 357.41       | 0.59 | 7 018.47       | 279.57         |
| Scenario8  | 1 480.07       | 0.62 | 6 995.24       | 271.74         |
| Scenario9  | 1 432.27       | 0.60 | 7 054.48       | 327.17         |

|            |          |      |          |        |
|------------|----------|------|----------|--------|
| Scenario10 | 1 409.08 | 0.59 | 7 053.31 | 321.81 |
| Scenario11 | 1 283.61 | 0.57 | 7 032.93 | 273.61 |
| Scenario12 | 1 416.60 | 0.60 | 7 012.92 | 268.70 |

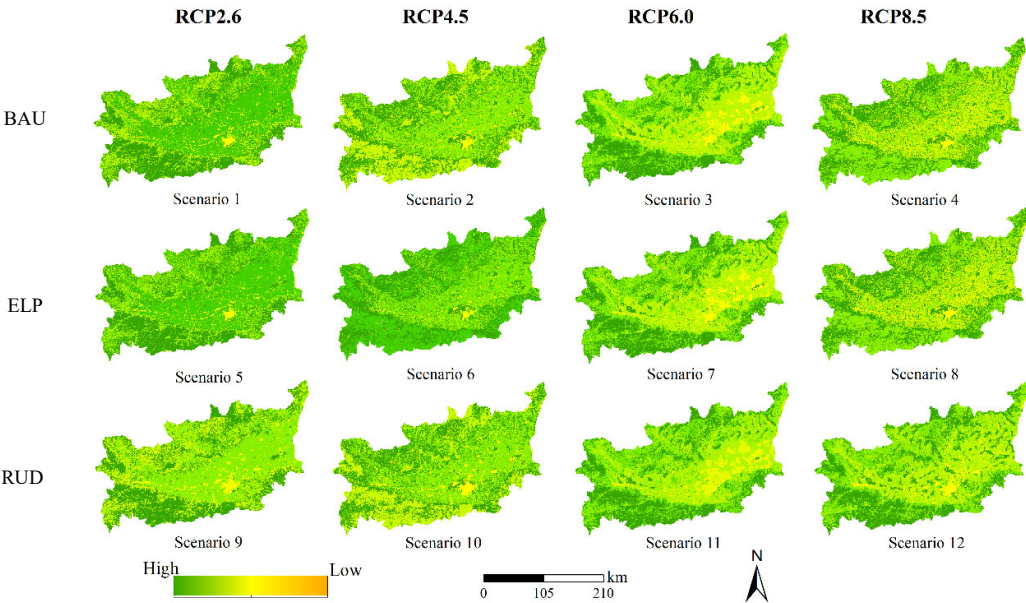

Figure S3. Carbon sequestration of each scenario in 2050 in Guanzhong Region.

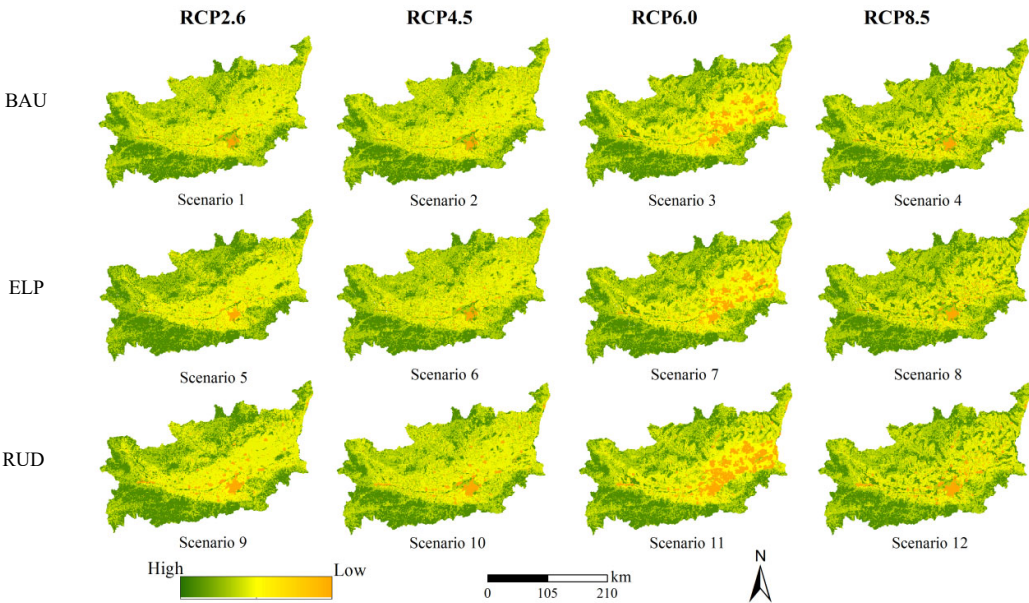

Figure S4. Habitat quality of each scenario in 2050 in Guanzhong Region.

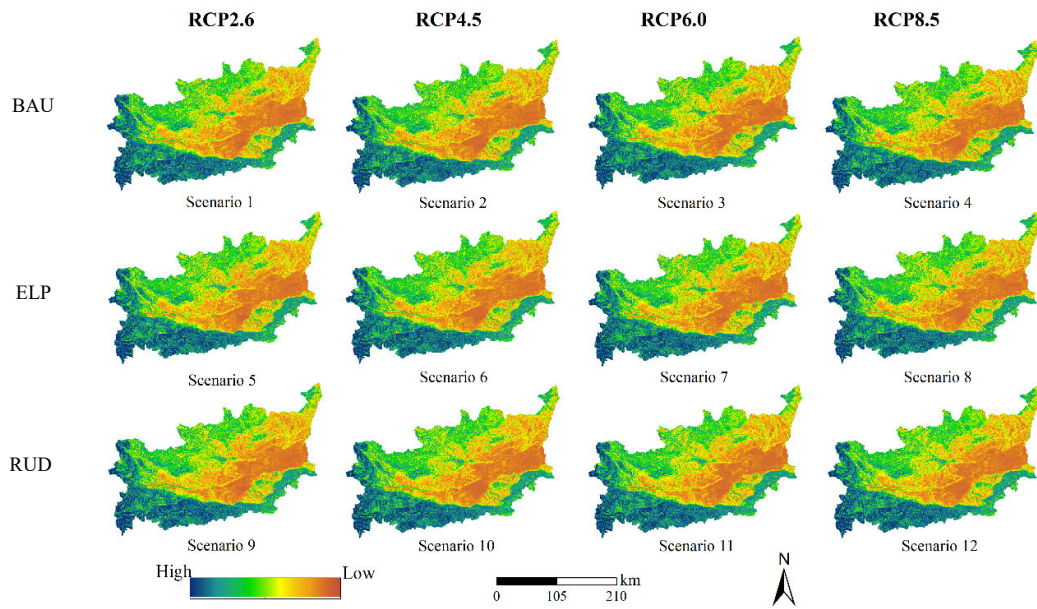

**Figure S5. Soil conservation of each scenario in 2050 in Guanzhong Region.**

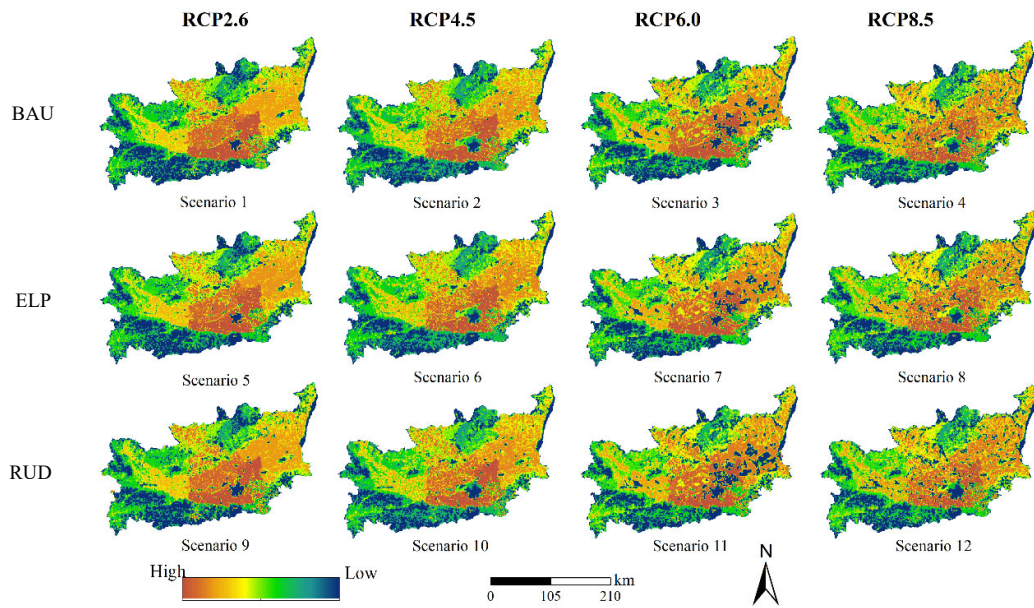

**Figure S6. Food supply of each scenario in 2050 in Guanzhong Region.**
